# Supplementary material
Source: publisher figshare collection journal article supplement (https://gsapubs.figshare.com/ndownloader/files/23319632)
Supplement: Supplementary file 1 [file 23319632]

## Sheet: Sheet1
TABLE DR1. PALEOMAGNETIC DATA: SAMPLING INFORMATION
Location/Formation	# of Sampling Horizons	# of Samples	# of Sampling Horizons with Line Fit	Percentage of Sampling Horizons with Line Fit	# of Samples with Line Fit	Percentage of Samples with Line Fit	# of Sampling Horizons with Great Circle Fit	Percentage of Sampling Horizons with Great Circle Fit	# of Samples with Great Circle Fit	Percentage of Samples with Great Circle Fit	# of Sampling Horizons with Site Mean	Percentage of Sampling Horizons with Site Mean
Kutz Canyon	25	68	22	88	47	69.1176	0	0	0	0	10	40
Chico Springs	12	36	8	66.6667	17	47.2222	5	41.6667	7	19.4444	2	16.6667
Gallegos Canyon	24	73	18	75	48	65.7534	7	29.1667	13	17.8082	12	50
De-Na-Zin	50	146	43	86	112	76.7123	0	0	0	0	26	52
Kimbeto Wash	32	93	25	78.125	63	67.7419	0	0	0	0	9	28.125
Betonnie Tsosie Wash	52	150	42	80.7692	102	68	7	13.4615	13	8.66667	24	46.1538
Mesa de Cuba	46	124	37	80.4348	84	67.7419	4	8.69565	5	4.03226	13	28.2609
Ojo Alamo Sandstone	4	12	3	75	8	66.6667	1	25	3	25	2	50
Nacimiento Formation	237	678	192	81.0127	465	68.5841	20	8.43882	35	5.16224	94	39.6624
Total	241	690	195	80.9129	473	68.5507	23	9.54357	38	5.50725	96	39.834
